# Supplementary material
Source: PubMed Central journal article supplement (PMC6862721)
Supplement: NIHMS1058492-supplement-Supplementary_Method.pdf [file NIHMS1058492-supplement-Supplementary_Method.pdf]

## Selection of core essential genes

To compile a conservative list of high-confidence core essential genes, we collected 78 published genome-wide CRISPR essentiality screens performed in 64 different human and 2 murine cell lines<sup>1-7</sup> and calculated the gene-level log<sub>2</sub> fold changes (LFC) by taking the geometric mean of probe-level LFCs over reference. To assess the dynamic range of all publicly available screens, we defined the overlap of genes commonly essential in 2 haploid gene-trap mutagenesis<sup>8</sup> and 4 early landmark CRISPR screens<sup>2</sup> as crude core essentialome and calculated the average LFC of these genes for every screen. Screens not passing an average LFC threshold  $\leq -1$ , as well as redundant screens were excluded from further analyses. To normalize the remaining 62 CRISPR screens, we scaled each dataset to an average LFC of -2 for the previously used crude core essential genes. Finally, we generate a refined list of 625 high-confidence core essential genes by filtering genes that: (1) are predicted to be essential by haploid genetic screens in HAP1 and KBM7<sup>8</sup>, (2) were tested in  $\geq 70\%$  of the 62 filtered CRISPR screens, (3) were detected as essential (normalized LFC  $\leq -1$ ) in  $\geq 85\%$  of the 62 filtered CRISPR screens.

1. Hart, T. *et al.* High-Resolution CRISPR Screens Reveal Fitness Genes and Genotype-Specific Cancer Liabilities. *Cell* **163**, 1515–1526 (2015).
2. Wang, T. *et al.* Identification and characterization of essential genes in the human genome. *Science (80-. )*. **350**, 1096–1101 (2015).
3. Aguirre, A. J. *et al.* Genomic Copy Number Dictates a Gene-Independent Cell Response to CRISPR/Cas9 Targeting. *Cancer Discov.* **6**, 914–929 (2016).
4. Tzelepis, K. *et al.* A CRISPR Dropout Screen Identifies Genetic Vulnerabilities and Therapeutic Targets in Acute Myeloid Leukemia. *Cell Rep.* **17**, 1193–1205 (2016).
5. Steinhart, Z. *et al.* Genome-wide CRISPR screens reveal a Wnt–FZD5 signaling circuit as a druggable vulnerability of RNF43-mutant pancreatic tumors. *Nat. Med.* **23**, 60–68 (2016).
6. Wang, T. *et al.* Gene Essentiality Profiling Reveals Gene Networks and Synthetic Lethal Interactions with Oncogenic Ras. *Cell* **168**, 890–903.e15 (2017).
7. Morgens, D. W. *et al.* Genome-scale measurement of off-target activity using Cas9 toxicity in high-throughput screens. *Nat. Commun.* **8**, 15178 (2017).
8. Blomen, V. A. *et al.* Gene essentiality and synthetic lethality in haploid human cells. *Science (80-. )*. **350**, 1092–1096 (2015).
